# Supplementary material for: Genetic Variation in miR-27a Is Associated with Fluoropyrimidine-Associated Toxicity in Patients with Dihydropyrimidine Dehydrogenase Variants after Genotype-Guided Dose Reduction
Source: MDPI journal article supplement (doi:10.3390/ijms241713284), 2023-08-27
Supplement: s1 [file s1]

## Supplemental Figures

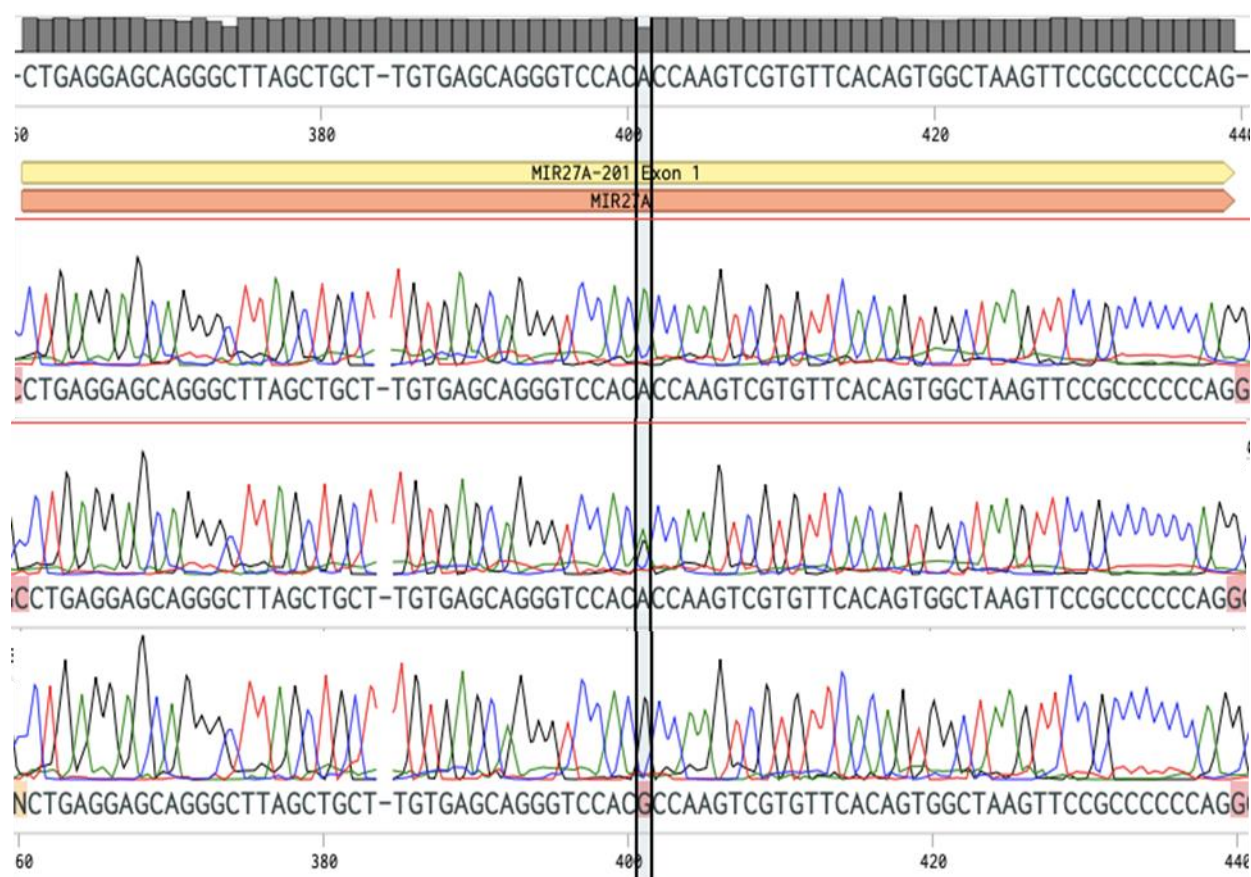

**Figure S1.** Sanger sequencing for miR27A. Highlighted is rs895819, with the top panel showing a homozygous wildtype, middle heterozygote and bottom homozygous variant.

**Table S1.** Severe fluoropyridine related adverse events during total treatment period.

|                        | Genotype                          | Grade $\geq 3$ Toxicity <sup>1</sup><br>during total treatment<br>period N, (%) | OR (95% CI)<br>(adjusted) | P-value |
|------------------------|-----------------------------------|---------------------------------------------------------------------------------|---------------------------|---------|
| Total Treatment Period | Wildtype                          | 63 (35)                                                                         | 1.0 (reference)           | 0.2792  |
|                        | <i>DPYD</i> Carriers <sup>2</sup> | 12 (27)                                                                         | 0.67 (0.31 to 1.36)       |         |
| Cycles 1 & 2           | Wildtype                          | 46 (26)                                                                         | 1.00 (reference)          | 0.1536  |
|                        | <i>DPYD</i> Carriers <sup>2</sup> | 7 (16)                                                                          | 0.53 (0.20 to 1.21)       |         |

<sup>1</sup>Grade  $\geq 3$  by Common Terminology Criteria for Adverse Events version 5.0; <sup>2</sup>*DPYD* variants include c.2846A>T, c.1905+1G>A, c.1679T>G and c.1236G>A.
